# Supplementary material for: Role of Social Media in Diabetes Management in the Middle East Region: Systematic Review
Source: PubMed Central journal article supplement (PMC5829453; doi:10.2196/jmir.9190), 2018-02-13
Supplement: jmir_v20i2e58_app1.pdf [file jmir_v20i2e58_app1.pdf]

**Table 1. The list of the reviewed studies and the type of the social networking interventions in the ME countries**

| <b>Author/<br/>year</b> | <b>Study type</b>                  | <b>Number of<br/>participants</b> | <b>Type of<br/>Diabetes</b> | <b>Study<br/>location</b>             | <b>Type of<br/>technological<br/>intervention</b>                                 | <b>Results summary</b>                                                                                                                                                                                                                                                                                                                                                             |
|-------------------------|------------------------------------|-----------------------------------|-----------------------------|---------------------------------------|-----------------------------------------------------------------------------------|------------------------------------------------------------------------------------------------------------------------------------------------------------------------------------------------------------------------------------------------------------------------------------------------------------------------------------------------------------------------------------|
| Alanzi,<br>2014         | Mixed<br>methods                   | 30                                | 1 and 2                     | Saudi Arabia<br>and United<br>Kingdom | Social networking<br>using cell phone                                             | Relatively high number of Saudi patients accept using social networking as a tool for better managements of their diabetes.                                                                                                                                                                                                                                                        |
| Alanzi,<br>2014         | Quasi-<br>experimental<br>Pre-post | 33                                | 2                           | Saudi Arabia                          | Mobile app:<br>Saudi Arabia<br>Networking<br>Aiding<br>Diabetes (SANAD)<br>system | The SANAD system used a smartphone diabetes management module to collect blood glucose records from diabetes patients. A higher satisfaction with the overall impression, and satisfaction including screen, learning, and capabilities aspects of the system. However, poor ratings were obtained in aspects relating to terminology and system information and learning factors. |
| Istepanian,<br>2014     | Quasi-<br>experimental<br>Pre-post | 12                                | 2                           | Iraq                                  | DIAR mobile<br>diabetes self-<br>management<br>system                             | The DIAR system lowered the HbA1c level in the intervention group from 8.95% to 8.05%. The outcome of the questionnaire survey showed that all patients were satisfied with mobile health intervention and agreed that the service should be continued as part of their medical care after the study.                                                                              |
| Alanzi,<br>2016         | Mixed<br>methods                   | 33                                | 2                           | Saudi Arabia                          | Mobile app:<br>Saudi Arabia<br>Networking                                         | Higher satisfaction with the overall impression, satisfaction, being stimulated, ease of use, perceived                                                                                                                                                                                                                                                                            |

|               |                   |                     |       |            |                                |                                                                                                                                                                                                  |
|---------------|-------------------|---------------------|-------|------------|--------------------------------|--------------------------------------------------------------------------------------------------------------------------------------------------------------------------------------------------|
|               |                   |                     |       |            | Aiding Diabetes (SANAD) system | powerfulness, and flexibility.                                                                                                                                                                   |
| AlQarni, 2016 | Exploratory study | 1551 Facebook posts | 1 & 2 | Arab world | Facebook                       | The focus of the posts was on sharing personal experiences (27%), raising awareness (3.5%), providing spiritual support (10.4%), sharing latest research (9.5%), and providing education (7.1%). |
